## Chromosome-level *de novo* genome assembly of *Telopea speciosissima* (New South

2 Wales waratah) using long-reads, linked-reads and Hi-C

4 Stephanie H Chen<sup>1,2</sup>, Maurizio Rossetto<sup>2,3</sup>, Marlien van der Merwe<sup>2</sup>, Patricia Lu-Irving<sup>2</sup>, Jia-Yee S  
Yap<sup>2,3</sup>, Hervé Sauquet<sup>4,5</sup>, Greg Bourke<sup>6</sup>, Jason G Bragg<sup>2,5</sup>, Richard J Edwards<sup>1</sup>, ✉

6 <sup>1</sup>School of Biotechnology and Biomolecular Sciences, UNSW Sydney, High St, Kensington, NSW 2052, Australia  
[stephanie.h.chen@unsw.edu.au](mailto:stephanie.h.chen@unsw.edu.au), [richard.edwards@unsw.edu.au](mailto:richard.edwards@unsw.edu.au)

8 <sup>2</sup>Research Centre for Ecosystem Resilience, Australian Institute of Botanical Science, The Royal Botanic Garden  
Sydney, Mrs Macquaries Rd, Sydney, NSW 2000, Australia

10 [maurizio.rossetto@rbgsyd.nsw.gov.au](mailto:maurizio.rossetto@rbgsyd.nsw.gov.au), [marlien.vandermerwe@rbgsyd.nsw.gov.au](mailto:marlien.vandermerwe@rbgsyd.nsw.gov.au), [patricia.lu-irving@bgcp.nsw.gov.au](mailto:patricia.lu-irving@bgcp.nsw.gov.au),  
[samantha.yap@rbgsyd.nsw.gov.au](mailto:samantha.yap@rbgsyd.nsw.gov.au), [jason.bragg@rbgsyd.nsw.gov.au](mailto:jason.bragg@rbgsyd.nsw.gov.au)

12 <sup>3</sup>Queensland Alliance of Agriculture and Food Innovation, University of Queensland, St Lucia 4072, Australia

<sup>4</sup>National Herbarium of New South Wales, Royal Botanic Gardens and Domain Trust, Mrs Macquaries Rd, Sydney,  
14 NSW 2000, Australia

[herve.sauquet@rbgsyd.nsw.gov.au](mailto:herve.sauquet@rbgsyd.nsw.gov.au)

16 <sup>5</sup>School of Biological, Earth and Environmental Sciences, UNSW Sydney, High St, Kensington, NSW 2052, Australia

<sup>6</sup>Blue Mountains Botanic Garden, Bells Line of Road, Mount Tomah, NSW 2758, Australia

18 [greg.bourke@bgcp.nsw.gov.au](mailto:greg.bourke@bgcp.nsw.gov.au)

✉ Corresponding author

20

### ORCID iD

22 SHC 0000-0001-8844-6864

MR 0000-0002-4878-9114

24 MVDM 0000-0003-1307-5143

PL-I 0000-0003-1116-9402

26 JSY 0000-0002-9141-6006

HS 0000-0001-8305-3236

28 JGB 0000-0002-7621-7295

RJE 0000-0002-3645-5539

30

## ABSTRACT

32

### Background

34 *Telopea speciosissima*, the New South Wales waratah, is Australian endemic woody shrub in the  
family Proteaceae. Waratahs have great potential as a model clade to better understand processes  
36 of speciation, introgression and adaptation, and are significant from a horticultural perspective.

### 38 Findings

Here, we report the first chromosome-level reference genome for *T. speciosissima*. Combining  
40 Oxford Nanopore long-reads, 10x Genomics Chromium linked-reads and Hi-C data, the assembly  
spans 823 Mb (scaffold N50 of 69.0 Mb) with 91.2 % of Embryophyta BUSCOs complete. We  
42 introduce a new method in Diploidocus (<https://github.com/slimsuite/diploidocus>) for classifying,  
curating and QC-filtering assembly scaffolds. We also present a new tool, DepthSizer  
44 (<https://github.com/slimsuite/depthsizer>) , for genome size estimation from the read depth of  
single copy orthologues and find that the assembly is 93.9 % of the estimated genome size. The  
46 largest 11 scaffolds contained 94.1 % of the assembly, conforming to the expected number of  
chromosomes ( $2n = 22$ ). Genome annotation predicted 40,158 protein-coding genes, 351 rRNAs  
48 and 728 tRNAs. Our results indicate that the waratah genome is highly repetitive, with a repeat  
content of 62.3 %.

50

## Conclusions

52 The *T. speciosissima* genome (Tspe\_v1) will accelerate waratah evolutionary genomics and facilitate  
marker assisted approaches for breeding. Broadly, it represents an important new genomic  
54 resource of Proteaceae to support the conservation of flora in Australia and further afield.

56 **Keywords:** *Telopea*, waratah, genome assembly, reference genome, long-read sequencing, Hi-C

## 58 INTRODUCTION

60 *Telopea* R.Br. is an eastern Australian genus of five species of large, long-lived shrubs in the  
flowering plant family Proteaceae. The New South Wales waratah, *Telopea speciosissima* (Sm.)  
62 R.Br., is a striking and iconic member of the Australian flora, characterised by large, terminal  
inflorescences of red flowers (Figure 1) and has been the state floral emblem of New South Wales  
64 since 1962 and one of the first Australian plant species collected for cultivation in Europe [1]. The  
species is endemic to the state of New South Wales, occurring on sandstone ridges in the Sydney  
66 region. Previous studies have investigated variation among *Telopea* populations by phenetic  
analysis of morphology [2] and evolutionary relationships using cladistics [3]. Population structure  
68 and patterns of divergence and introgression between *T. speciosissima* populations have been  
characterised using several loci [4]. Further, microsatellite data and modelling suggest a history of  
70 allopatric speciation followed by secondary contact and hybridization among *Telopea* species [5].  
These studies point to the great potential of *Telopea* as a model clade for understanding processes  
72 of divergence, environmental adaptation and speciation. Our understanding of these processes can  
be greatly enhanced by a genome-wide perspective, enabled by a reference genome [6–10].

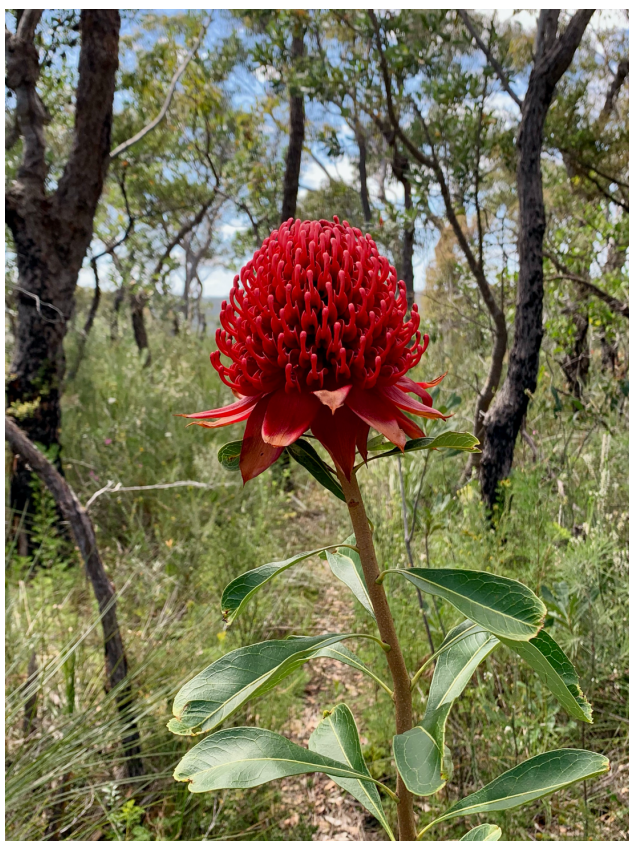

74

Figure 1. New South Wales waratah (*Telopea speciosissima*). Photo taken by SH Chen.

76

Genome sequencing efforts have traditionally focused on model species, crops and their wild  
78 relatives, resulting in a highly uneven species distribution of reference genomes across the plant  
tree of life [11]. Despite Proteaceae occurring across several continents and encompassing 81  
80 genera and ca. 1700 species [12,13], the only publicly available reference genome in the family is a  
widely-grown cultivar of the most economically important crop in the family, *Macadamia*  
82 *integrifolia* (macadamia nut) HAES 74 [14,15]. Waratahs are significant to the horticultural and cut  
flower industries, with blooms cultivated for the domestic and international markets; a reference  
84 genome will accelerate efforts in breeding for traits such as resistance to pests and diseases (e.g.  
*Phytophthora* root rot) as well as desirable floral characteristics [16]. More reference genomes in  
86 the Proteaceae family will also facilitate research into the molecular evolution of the group.



88 Here, we provide a high quality long-read *de novo* assembly of the *Telopea speciosissima* genome,  
using Oxford Nanopore long-reads, 10x Genomics Chromium linked-reads and Hi-C, which will serve  
90 as an important platform for evolutionary genomics and the conservation of the Australian flora.

## 92 DNA EXTRACTION AND SEQUENCING

### 94 **Sampling and DNA extraction**

Young leaves (approx. 8 g) were sampled from the reference genome individual (NCBI BioSample  
96 SAMN18238110) where it grows naturally along the Tomah Spur Fire Trail (-33.53° S, 150.42° E) on  
land belonging to the Blue Mountains Botanic Garden, Mount Tomah in New South Wales,  
98 Australia. Leaves were immediately frozen in liquid nitrogen and stored at -80° C prior to extraction.

100 High-molecular-weight (HMW) genomic DNA (gDNA) was obtained using a sorbitol pre-wash step  
prior to a CTAB extraction adapted from Inglis et al. [17]. The gDNA was then purified with AMPure  
102 XP beads (Beckman Coulter, Brea, CA, USA) using a protocol based on Schalamun et al. [18] (details  
available on protocols.io [19]). The quality of the DNA was assessed using Qubit, NanoDrop and  
104 TapeStation 2200 System (Agilent, Santa Clara, CA, USA).

### 106 **ONT PromethION sequencing**

We performed an in-house sequencing test on the MinION (MinION, RRID:[SCR\\_017985](#)) using a  
108 FLO-MINSP6 (R9.4.1) flow cell with a library prepared with the ligation kit (SQK-LSK109). The  
remaining purified genomic DNA was sent to the Australian Genome Research Facility (AGRF)  
110 where size selection was performed to remove small DNA fragments using the BluePippin High Pass

Plus Cassette on the BluePippin (Sage Science, Beverly, MA, USA). Briefly, 10 µg of DNA was split  
112 into 4 aliquots (2.5 µg) and diluted to 60 µL in TE buffer. Then, 20 µL of RT equilibrated loading  
buffer was added to each aliquot and mixed by pipetting. Samples were loaded on the cassette by  
114 removing 80 µL of buffer from each well and adding 80 µL of sample or external marker. The  
cassette was run with the 15 kb High Pass Plus Marker U1 cassette definition. Size selected fractions  
116 (approximately 80 µL) were collected from the elution module following a 30 min electrophoresis  
run. The library was prepared with the ligation sequencing kit (SQK-LSK109). The sequencing was  
118 performed using MinKNOW v.19.12.2 (MinION) and v12.12.8 (PromethION) and MinKNOW Core  
v3.6.7 (in-house test), v3.6.8 (AGRF MinION) and v3.6.7 (AGRF PromethION). A pilot run was first  
120 performed on the MinION using the FLO-MIN106 (R9.4.1) flow cell followed by two FLO-PRO002  
flow cells (R9.4) on the PromethION (PromethION, [RRID:SCR\\_017987](#)).

122  
Basecalling was performed after sequencing with GPU-enabled Guppy v3.4.4 using the high-  
124 accuracy flip-flop models, resulting in 54x coverage. The output from all ONT basecalling was  
pooled for adapter removal using Porechop (Porechop, [RRID:SCR\\_016967](#)) v.0.2.4 [20] and quality  
126 filtering (removal of reads less than 500 bp in length and Q lower than 7) with NanoFilt (NanoFilt,  
[RRID:SCR\\_016966](#)) v2.6.0 [21] followed by assessment using FastQC (FastQC, [RRID:SCR\\_014583](#))  
128 v0.11.8 [22].

### 130 **10x Genomics Chromium sequencing**

High-molecular-weight gDNA was sent to AGRF for 10x Genomics Chromium sequencing. Size  
132 selection was performed to remove DNA fragments <40 kb using the BluePippin 0.75 % Agarose Gel  
Cassette, Dye Free on the BluePippin (Sage Science, Beverly, MA, USA). Briefly, 5 µg of DNA was  
134 diluted to 30 µL in TE buffer and 10 µL of RT equilibrated loading buffer was added to each aliquot

and mixed by pipetting. Samples were loaded on the cassette by removing 40  $\mu$ L of buffer from  
136 each well and adding 40  $\mu$ L of sample or external marker. The cassette was run with the 0.75 % DF  
Marker U1 high-pass 30-40 kb v3 cassette definition. Size selected fractions (approximately 40  $\mu$ L)  
138 were collected following the 30 min electrophoresis run. The library was prepared using the  
Chromium Genome Library Kit & Gel Bead Kit and sequenced (2 x 150 bp paired-end) on the  
140 NovaSeq 6000 (Illumina NovaSeq 6000 Sequencing System, [RRID:SCR\\_016387](#)) with NovaSeq 6000  
SP Reagent Kit (300 cycles) and NovaSeq XP 2-Lane Kit for individual lane loading.

142

### Hi-C sequencing

144 Hi-C library preparation and sequencing was conducted at the Ramaciotti Centre for Genomics at  
the University of New South Wales using the Phase Genomics Plant kit v3.0. The library was  
146 assessed using Qubit and the Agilent 2200 TapeStation system (Agilent Technologies, Mulgrave,  
VIC, Australia). A pilot run on an Illumina iSeq 100 with 2 x 150 bp paired end sequencing run was  
148 performed for QC using hic\_qc v1.0 [23] with i1 300 cycle chemistry. This was followed by  
sequencing on the Illumina NextSeq 500 (Illumina NextSeq 500, [RRID:SCR\\_014983](#)) with 2 x 150 bp  
150 paired-end high output run and NextSeq High Output 300 cycle kit v2.5 chemistry.

152 The ONT, 10x and Hi-C sequencing yielded a total of 48.3, 123.4 and 25.0 Gb of sequence,  
respectively (Table 1).

154

156

158

Table 1. Library information of *Telopea speciosissima* reference genome (Tspe\_v1).

| Sequencing platform           | Library                             | Median insert size (bp) | Mean read length (bp) | No. of reads       | Sequence bases (Gb) |
|-------------------------------|-------------------------------------|-------------------------|-----------------------|--------------------|---------------------|
| Oxford Nanopore Technologies* | Ligation (SQK-LSK109)               | -                       | 13,449                | 3,595,148          | 48.3                |
| Illumina NovaSeq 6000         | Paired-end 10x Chromium             | 336                     | 2 x 150               | 822,558,750        | 123.4               |
| <b>Total gDNA</b>             | -                                   | -                       | -                     | <b>826,153,898</b> | <b>171.7</b>        |
| Illumina NextSeq 500^         | Phase Genomics Proximo Hi-C (Plant) | 174                     | 2 x 151               | 165,573,702        | 25.0                |

160

\* Two PromethION flow cells and two partial flow cells from a MinION pilot run

162

^ Includes a pilot iSeq run used to QC the library

164

## GENOME ASSEMBLY AND VALIDATION

166

Our assembly workflow consisted of assembling a draft long-read assembly, polishing the assembly with Illumina reads and scaffolding the assembly into chromosomes using Hi-C data (Figure 2).

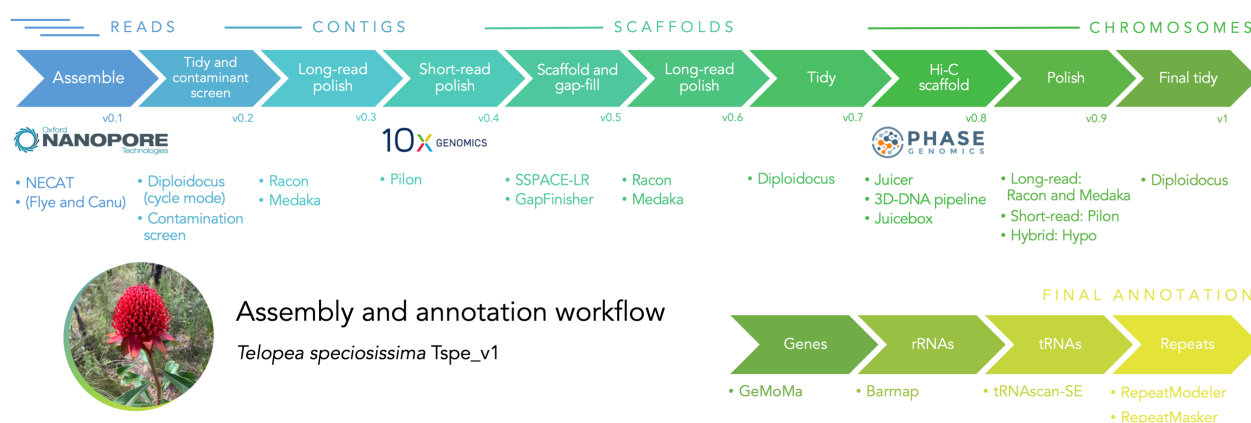

168

Figure 2. Assembly and annotation workflow for the *Telopea speciosissima* reference genome

170

Tspe\_v1. Logos reproduced with permission. Waratah photo by SH Chen.

## 172 **Draft long-read and 10x assemblies**

The first stage of our assembly approach involved comparing three long-read assemblers using the  
174 ONT data as input: NECAT v0.01 [24], Flye (Flye, [RRID:SCR\\_017016](#)) v2.6 [25] and Canu (Canu,  
[RRID:SCR\\_015880](#)) v1.9 [26]. The genome size parameter used for the assemblers was 1134 Mb, as  
176 previously reported for *Telopea truncata* [27]. We later refined genome size estimates for *T.*  
*speciosissima* (see ‘DepthSizer: genome size estimation using single-copy orthologue sequencing  
178 depths’ section below).

180 The best draft genome assembly was assessed on three metrics: contiguity (N50), BUSCO  
completeness, and proximity to the estimated genome size. NECAT resulted in the most contiguous  
182 assembly, at 365 contigs and the highest BUSCO completeness at 81.2 %. This was followed by Flye  
at 2,484 contigs and 81.0 % complete, then Canu at 3,983 contigs at 78.4 % complete.

184

As a comparison to the long-read assemblies, the 10x data were assembled with Supernova  
186 (Supernova assembler, [RRID:SCR\\_016756](#)) v2.1.1 [28] with 332 Mb reads as input, aiming for 56x  
raw coverage. We generated pseudohaploid output of the assembly for comparison (pseudohap2  
188 ‘.1’ fasta). The BUSCO score was higher than each of the long-read assemblies at 91.8 %. However,  
the 10x assembly had much lower contiguity at 43,951 contigs, as expected (Table 2).

190

### **Assembly completeness and accuracy**

192 Completeness was evaluated by BUSCO (BUSCO, [RRID:SCR\\_015008](#)) v3.0.2b [29], implementing  
BLAST+ v2.2.31 [30], Hmmer (Hmmer, [RRID:SCR\\_005305](#)) v3.2.1 [31], Augustus (Augustus,  
194 [RRID:SCR\\_008417](#)) v3.3.2 [32] and EMBOSS (EMBOSS, [RRID:SCR\\_008493](#)) v6.6.0 [33]) against the  
embryophyta\_odb9 dataset (n = 1,440; Table S1). BUSCO results were collated using BUSCOMP

196 (BUSCO Compilation and Comparison Tool; [RRID:SCR\\_021233](#)) v0.11.0 [34] to better evaluate the  
gains and losses in completeness between different assembly stages (Figure 3, Additional file 1).  
198 Notably, polishing markedly improved the BUSCO score – long-read polishing increased complete  
BUSCOs from 1,167 to 1,308 and short-read polishing further increased this to 1,333. We recovered  
200 a maximal non-redundant set of 1,386 complete single copy BUSCOs across the set of assemblies.  
Assembly quality (QV) was also estimated using k-mer analysis of trimmed and filtered 10x linked-  
202 read data by Merqury v1.0 with k = 20 [35]. First, 30 bp from the 5' end of read 1 and 10 bp from  
the 5' end of read 2 were trimmed using BBmap (BBmap, [RRID:SCR\\_016965](#)) v38.51 [36]. In  
204 addition, reads were trimmed to Q20, then those shorter than 100 bp were discarded.

206

208

210

212

214



216 Table 2. *Telopea speciosissima* assembly summaries.

| Assembly                                 | Supernova<br>pseudohap2 | v0.1 Canu             | v0.1 Flye             | v0.1 NECAT            |
|------------------------------------------|-------------------------|-----------------------|-----------------------|-----------------------|
| <b>Total length (bp)</b>                 | <b>850,975,689</b>      | <b>981,953,849</b>    | <b>857,703,641</b>    | <b>842,143,239</b>    |
| <b>No. of scaffolds</b>                  | <b>27,610</b>           | <b>3,983</b>          | <b>2,445</b>          | <b>365</b>            |
| N50 (bp)                                 | 874,466                 | 1,848,137             | 2,271,126             | 10,701,597            |
| L50                                      | 247                     | 132                   | 94                    | 24                    |
| <b>No. of contigs</b>                    | <b>43,951</b>           | <b>3,983</b>          | <b>2,484</b>          | <b>365</b>            |
| N50 (bp)                                 | 72,725                  | 1,848,137             | 2,199,532             | 10,701,597            |
| L50                                      | 3,268                   | 132                   | 101                   | 24                    |
| N bases                                  | 18,076,790              | 0                     | 3,900                 | 0                     |
| GC (%)                                   | 40.1                    | 39.95                 | 40.47                 | 40.15                 |
| <b>BUSCO complete (genome; n = 1440)</b> | <b>91.8 % (1,323)</b>   | <b>78.4 % (1,129)</b> | <b>81.0 % (1,167)</b> | <b>81.2 % (1,169)</b> |
| Single copy                              | 81.2 % (1,170)          | 68.6 % (988)          | 74.9 % (1,079)        | 75.2 % (1,083)        |
| Duplicated                               | 10.6 % (153)            | 9.8 % (141)           | 6.1 % (88)            | 6.0 % (86)            |
| BUSCO fragmented                         | 3.1 % (44)              | 5.2 % (75)            | 4.2 % (60)            | 4.3 % (62)            |
| BUSCO missing                            | 5.1 % (73)              | 16.4 % (236)          | 14.8 % (213)          | 14.5 % (209)          |
| <b>Mercury completeness (%)</b>          | <b>89.84</b>            | <b>74.86</b>          | <b>76.06</b>          | <b>74.90</b>          |
| Solid k-mers in the assembly             | 531,141,929             | 442,555,507           | 449,643,538           | 442,822,843           |
| Total solid k-mers in read set           | 591,186,146             | 591,186,146           | 591,186,146           | 591,186,146           |
| <b>Mercury QV</b>                        | <b>46.75</b>            | <b>19.90</b>          | <b>20.45</b>          | <b>20.21</b>          |
| k-mers unique to assembly                | 351,669                 | 182,400,749           | 141,959,491           | 146,903,850           |
| k-mers in both assembly and read-set     | 832,063,849             | 981,878,172           | 857,652,545           | 842,136,304           |
| Error rate                               | 0.000021                | 0.010223              | 0.009007              | 0.009539              |

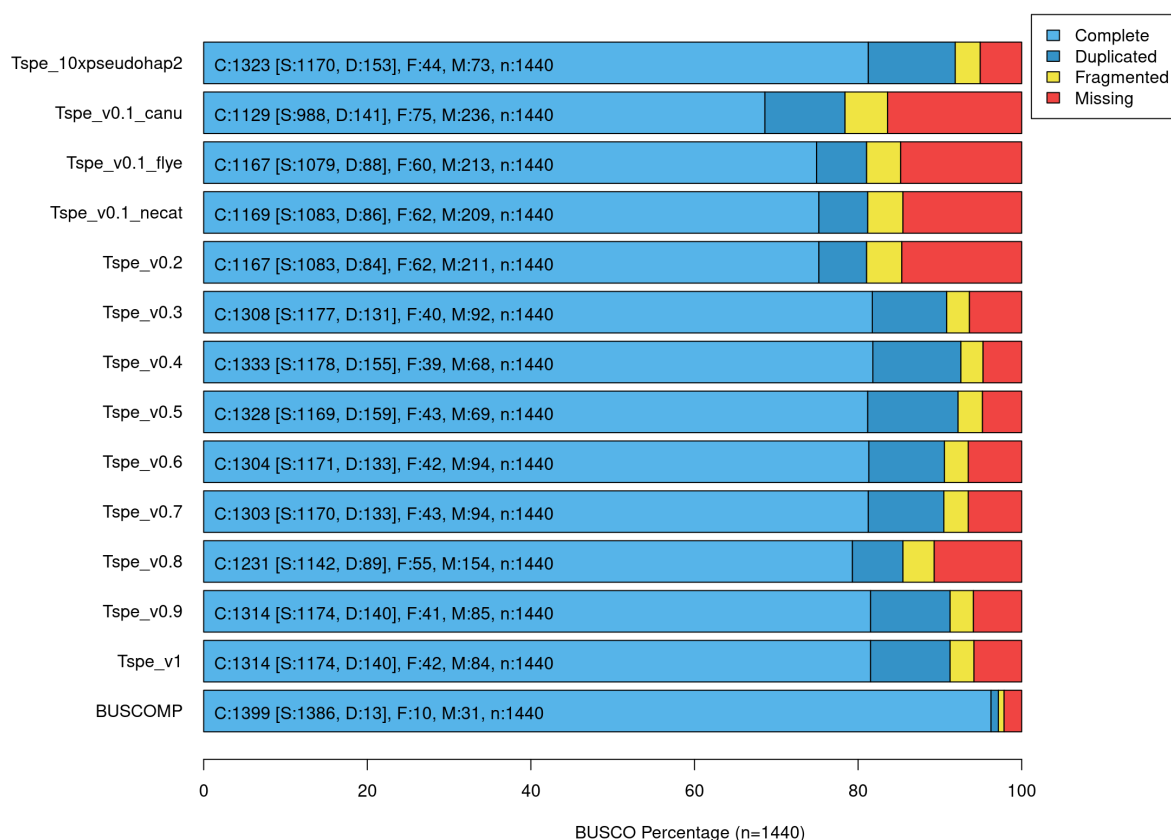

218

Figure 3. BUSCOMP summary of BUSCO completeness rating compiled over different stages (see Figure 2) of the *Telopea speciosissima* genome assembly. The final BUSCOMP rating uses the best rating per BUSCO gene across any of the assemblies.

222

### DepthSizer: genome size estimation using single-copy orthologue sequencing depths

224

*Telopea speciosissima* has been reported as a diploid ( $2n = 22$ ) [37,38]. We confirmed the

individual's diploid status using Smudgeplot v0.2.1 [39] (Figure S1a). The 1C-value of *T. truncata*

226

(Tasmanian waratah) has been estimated at 1.16 pg (1.13 Gb) using flow cytometry [27]. Supernova v2.1.1 predicted a genome size of 953 Mb from the assembly of the 10x linked-reads whilst

228

GenomeScope (GenomeScope, [RRID:SCR\\_017014](https://doi.org/10.1101/2017.07.03.161448)) v1.0 [40] predicted a smaller genome of 794 Mb from the same data (Figure S1b).

230

We sought to refine the genome size estimate of *T. speciosissima* using the ONT data and draft  
232 genome assemblies, implementing a new tool, DepthSizer  
(<https://github.com/slimsuite/depthsizer>, [RRID:SCR\\_021232](#)). ONT reads were mapped onto each  
234 draft genome using Minimap2 (Minimap2, [RRID:SCR\\_018550](#)) v2.17 [41] (--secondary=no -ax map-  
ont). The single-copy read depth for each assembly was then calculated as the modal read depth  
236 across single copy complete BUSCO genes, which should be reasonably robust to poor-quality  
and/or repeat regions within these genes [42].

238  
By definition, sequencing depth ( $X$ ) is the volume of sequencing divided by the genome size. Given a  
240 known volume of sequencing, it is therefore possible to estimate the genome size by estimating the  
achieved sequencing depth. DepthSizer works on the principle that the modal read depth across  
242 single copy BUSCO genes provides a good estimate of the true depth of coverage. This assumes that  
genuine single copy depth regions will tend towards the same, true, single copy read depth. In  
244 contrast, assembly errors or collapsed repeats within those genes, or incorrectly-assigned single  
copy genes, will give inconsistent read depth deviations from the true single copy depth. (The  
246 exception is regions of the genome only found on one haplotig – half-depth alternative haplotypes  
for regions also found in the main assembly – such as heterogametic sex chromosomes [42], but  
248 these are unlikely to outnumber genes present in single copy on both homologous chromosomes.)  
As a consequence, the dominant (i.e. modal) depth across these regions should represent single  
250 copy sequencing depth. First, the distribution of read depth for all single copy genes is generated  
using Samtools (Samtools, [RRID:SCR\\_002105](#)) v0.11 [43] mpileup, and the modal peak calculated  
252 using the ‘density’ function of R (R Project for Statistical Computing, [RRID:SCR\\_001905](#)) v3.5.3 [44]  
(allowing a non-integer estimation). Genome size,  $G$ , was then estimated from the modal peak  
254 single-copy depth,  $X_{sc}$ , and the total volume of sequencing data,  $T$ , using the formula:

$$G = T / X_{SC}$$

256

This estimate does not account for any non-nuclear (or contamination) read data, nor any  
258 biases/inconsistencies in read mapping and/or raw read insertion/deletion error profiles. As a  
consequence, this will tend to be an overestimate. We also calculated a second genome size  
260 estimate, adjusting for read mapping and imbalanced insertion:deletion ratios. Here, samtools  
coverage was used to estimate the total number of bases mapped onto the assembly (assembly  
262 bases with coverage x average depth) and Samtools fasta to extract all the mapped reads. The ratio  
of the mapped read bases,  $M$ , to the summed length of mapped reads,  $L$ , is then calculated and  
264 used to adjust  $T$ :

$$266 \quad T_{adj} = T.M / L$$

$$G_{adj} = T_{adj} / X_{SC}$$

268

DepthSizer also outputs genome size predictions based on the integer modal read depth across  
270 single-copy complete BUSCO genes, and the mode of modal read depths across single-copy  
complete BUSCO genes.

272

We used genome size estimates to assess long-read assembly completeness to guide decisions in  
274 the first stage of the assembly progress. DepthSizer analysis of the three draft genome assemblies  
estimated the genome size of *T. speciosissima* to range from 806 Mb (Flye density mode with  
276 mpileup adjusted) to 926 Mb (Canu mode of modes with mpileup; Table S2), which falls between  
the Supernova and GenomeScope estimates. The mean estimate across the three genomes with six  
278 methods each (mode method: BUSCO mode/mode of modes/density mode x depth method:

mpileup/mpileup-adjusted) was 874 Mb. The mpileup-adjusted depth method resulted in slightly  
280 smaller estimated genome sizes compared to the non-adjusted depth method, indicating a slight  
bias towards insertion versus deletion errors in the raw ONT reads. We report an estimated  
282 genome size of 876.4 Mb, based on Tspe\_v1 using the density and mpileup-adjusted parameters,  
which is theoretically the most robust method.

284

### **Assembly tidying and contamination screening**

286 According to the three chosen metrics, we moved forward with the NECAT assembly (Table S1).  
Whilst Supernova had a higher BUSCO completeness (91.8% versus 81.2%), NECAT was orders of  
288 magnitude better in terms of contiguity (10.7 Mb N50 on 365 contigs vs 874 kb N50 on 27,610  
scaffolds). The draft genome was screened and filtered to remove contamination, low-quality  
290 contigs and putative haplotigs using more rigorous refinement of the approach taken for the  
Canfam\_GSD (German Shepherd) and CanFam\_Bas (Basenji) dog reference genomes [42,45],  
292 implemented in Diploidocus v0.9.6 (<https://github.com/slimsuite/diploidocus>, RRID:SCR\_021231).

294 First, the assembly was screened against the NCBI UniVec database  
(<ftp://ftp.ncbi.nlm.nih.gov/pub/UniVec/>, downloaded 05/08/2019) to identify and remove  
296 contaminants. Hits are first scored using rules derived from NCBI Vecscreen  
(<https://www.ncbi.nlm.nih.gov/tools/vecscreen/>) and regions marked as 'Terminal' (within 25 bp of  
298 a sequence end), 'Proximal' (within 25 bases of another match) or 'Internal' (>25 bp from sequence  
end or vecscreen match). Then, any segment of fewer than 50 bases between two vector matches or  
300 between a match and a sequence end are marked as 'Suspect'. In our experience, default  
Vecscreen parameters appear prone to excessive false positives in large genomes (data not shown),  
302 and so Diploidocus features two additional contaminant identification filters. First, the 'Expected

False Discovery Rate' (eFDR) is calculated for each contaminant sequence. This is simply the BLAST+  
304 Expect value for that hit, divided by the total number of hits at that Expect value threshold. Any hits  
with an eFDR value exceeding the default threshold of 1.0 were filtered from the vecscreen results.  
306 Short matches in long-read assemblies are unlikely to be real contamination and a second filter was  
applied, restricting contaminant screening to a minimum hit length of 50 bp. Finally, the percentage  
308 coverage per scaffold is calculated from the filtered hits. This is performed first for each  
contaminant individually, before being collapsed into total non-redundant contamination coverage  
310 per query. Diploidocus then removes any scaffolds with at least 50% contamination, trims off any  
vector hits within 1 kb of the scaffold end, and masks any remaining vector contamination of at  
312 least 900 bp. This masking replaces every other base with an N to avoid an assembly gap being  
inserted: masked regions should be manually fragmented if required. Diploidocus can also report  
314 the number of mapped long reads that completely span regions flagged as contamination.

316 After contamination screening, a sorted BAM file of ONT reads mapped to the filtered assembly is  
generated using Minimap2 v2.17 (-ax map-ont --secondary = no) [41]. BUSCO Complete genes (see  
318 above) were used to estimate a single-copy read depth of 54X. This was used to set low-, mid- and  
high-depth thresholds for Purge Haplotigs (Purge\_haplotigs, [RRID:SCR\\_017616](#)) v20190612 [46]  
320 (implementing Perl v5.28.0, BEDTools (BEDTools, [RRID:SCR\\_006646](#)) v2.27.1 [47], R v3.5.3 [44], and  
SAMTools v1.9 [43]) of 13X, 40X and 108X. Purge Haplotigs coverage bins were adjusted to  
322 incorporate zero-coverage bases, excluding assembly gaps (defined as 10+ Ns). Counts of Complete,  
Duplicate and Fragmented BUSCO genes were also generated for each sequence. General read  
324 depth statistics for each sequence were calculated with BBMap v38.51 pileup.sh [36]. The sect  
function of KAT (KAT, [RRID:SCR\\_016741](#)) v2.4.2 [48] was used to calculate k-mer frequencies for the  
326 10x linked reads (first 16 bp trimmed from read 1), and the assembly itself. Telomeres were



predicted using a method adapted from <https://github.com/JanaSperschneider/FindTelomeres>,  
328 searching each sequence for 5' occurrences of a forward telomere regular expression sequence,  
C{2,4}T{1,2}A{1,3}, and 3' occurrences of a reverse regular expression, T{1,3}A{1,2}G{2,4}.  
330 Telomeres were marked if at least 50% of the terminal 50 bp matches the appropriate sequence.

332 Diploidocus combines read depth, KAT k-mer frequencies, Purge Haplotigs depth bins, Purge  
Haplotigs best sequence hits, BUSCO gene predictions, telomere prediction and vector  
334 contamination into a single seven-part (PURITY|DEPTH|HOM|TOP|MEDK|BUSCO+EXTRA)  
classification (Table 3). Diploidocus then performs a hierarchical rating of scaffolds, based on their  
336 classifications and compiled data (Table 4, Figure 4). Based on these ratings, sequences are divided  
into sets (Table 4):

- 338 1. Core. Predominantly diploid scaffolds and unique haploid scaffolds with insufficient  
evidence for removal.
- 340 2. Repeats. Unique haploid scaffolds with insufficient evidence for removal but dominated by  
repetitive sequences. High coverage scaffolds representing putative collapsed repeats.
- 342 3. Quarantine. Messy repetitive sequences and strong candidates for alternative haplotigs.
4. Junk. Low coverage, short and/or high-contaminated sequences.

344

If any sequences are marked as 'Quarantine' or 'Junk', sequences in the 'Core' and 'Repeat' sets are  
346 retained and used as input for another round of classification and filtering. Convergence was  
reached after three cycles with 148 core sequences and 62 repeat sequences retained (see Table S3  
348 for summary of cycles and Table S4 for full output).

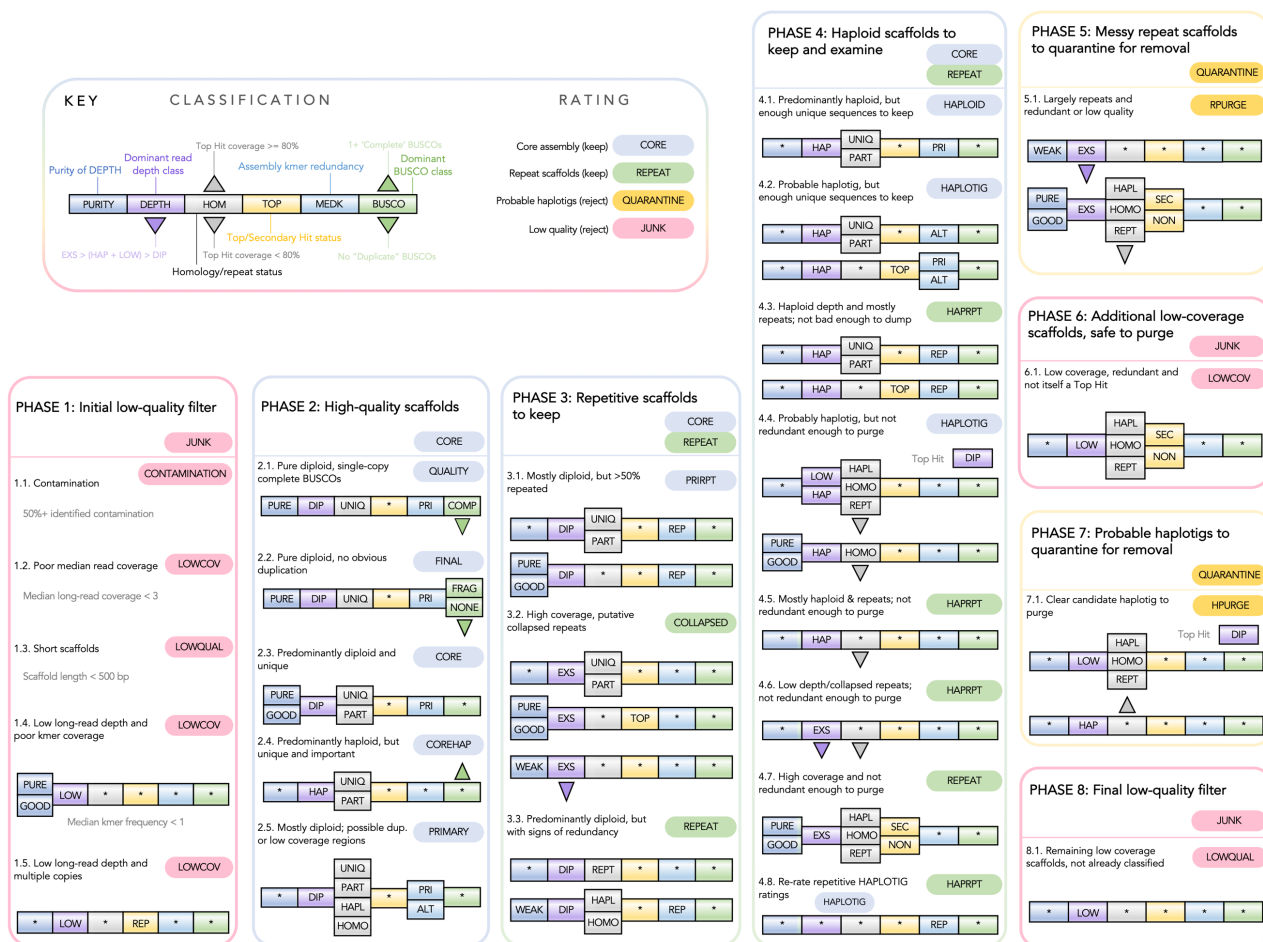

350 Figure 4. Diploidocus scaffold rating process based on a six-part classification. Asterisks indicate any  
 351 class value is accepted. Phases are executed in order. Consequently, rules for later phases appear  
 352 less restrictive than the full set of criteria required to receive that rating. See main text, Table 3 and  
 353 Table 4 for details of the six-part classification and final ratings.

354

356

358

360

Table 3. Diploidocus sequence classification.

| Criterion | Description                                                                                                                                                                                                                                                                                                                                                                                                                                                                                                                                    |
|-----------|------------------------------------------------------------------------------------------------------------------------------------------------------------------------------------------------------------------------------------------------------------------------------------------------------------------------------------------------------------------------------------------------------------------------------------------------------------------------------------------------------------------------------------------------|
| PURITY    | <p>Purity of dominant read depth class</p> <ul style="list-style-type: none"> <li>• PURE = At least 80% of sequence in that depth bin</li> <li>• GOOD = At least 50% of sequence in that depth bin</li> <li>• WEAK = Under 50% of sequence in that depth bin</li> </ul>                                                                                                                                                                                                                                                                        |
| DEPTH     | <p>Dominant read depth class based on BMap and Purge Haplotigs (PH)</p> <ul style="list-style-type: none"> <li>• LOWX = Median read depth below 3</li> <li>• LOW = PH Low read depth bin has highest percentage coverage (ties assigned to other class)</li> <li>• HAP = PH Hap read depth bin has highest percentage coverage (non-DIP ties assigned to HAP)</li> <li>• DIP = PH Dip read depth bin has highest percentage coverage (ties assigned to DIP)</li> <li>• EXS = PH High read depth bin has highest percentage coverage</li> </ul> |
| HOM       | <p>Homology/repeat status based on Purge Haplotigs Top and Secondary hits</p> <ul style="list-style-type: none"> <li>• UNIQ = No Top Hit</li> <li>• PART = Partial (&lt;50%) coverage of Top Hit</li> <li>• HAPL = 50%+ Top Hit coverage but no Secondary Hit</li> <li>• HOMO = Top Hit and Secondary Hit but combined coverage &lt; 250%</li> <li>• REPT = Top Hit and Secondary Hit and 250%+ combined coverage</li> </ul>                                                                                                                   |
| TOP       | <p>Top/Secondary Hit status for sequence</p> <ul style="list-style-type: none"> <li>• TOP = Sequence is a Top Hit for at least one other sequence</li> <li>• SEC = Sequence is a Secondary Hit but not a Top Hit for at least one other sequence</li> <li>• NON = Neither a Top Hit nor a Secondary Hit for any other sequence</li> </ul>                                                                                                                                                                                                      |
| MEDK      | <p>Assembly redundancy based on KAT assembly kmers</p> <ul style="list-style-type: none"> <li>• PRI = Over 50% unique kmers (KAT median assembly kmer frequency = 1)</li> <li>• ALT = KAT median assembly kmer frequency of two</li> <li>• REP = KAT median assembly kmer frequency exceeds two</li> </ul>                                                                                                                                                                                                                                     |
| BUSCO     | <p>Dominant BUSCO class</p> <ul style="list-style-type: none"> <li>• COMP = 1+ Complete BUSCO genes and more Complete than Duplicated</li> <li>• DUPL = 1+ Duplicated BUSCO genes and more Duplicated than Complete</li> <li>• FRAG = 1+ Fragmented BUSCO genes and no Complete or Duplicated</li> <li>• NONE = No Complete, Duplicated or Fragmented BUSCO genes</li> </ul>                                                                                                                                                                   |
| EXTRA     | <p>+TEL: If any telomeres are detected, +TEL is added</p> <p>+VEC: If any contamination is detected, +VEC is added</p>                                                                                                                                                                                                                                                                                                                                                                                                                         |

Table 4. Diploidocus sequence rating.

| Rating        | Description                                                                                                                                                                                  | Set        |
|---------------|----------------------------------------------------------------------------------------------------------------------------------------------------------------------------------------------|------------|
| COLLAPSED     | High coverage scaffolds representing putative collapsed repeats                                                                                                                              | Repeat     |
| CONTAMINATION | 50%+ identified contamination.                                                                                                                                                               | Junk       |
| CORE          | Predominantly non-repetitive, diploid depth sequences with <50% covered by Purge Haplotigs Top Hit.                                                                                          | Core       |
| COREHAP       | Predominantly haploid read depth but less than 50% covered by Purge Haplotigs Top Hit and at least 1 Complete BUSCO. Probable haploid-depth region of genome.                                | Core       |
| FINAL         | High quality scaffolds with dominant diploid depth                                                                                                                                           | Core       |
| HAPLOID       | Predominantly haploid coverage but enough unique sequence to keep - might represent very heterozygous alternative haplotigs.                                                                 | Core       |
| HAPLOTIG      | Predominantly haploid coverage but enough unique sequence to keep - possible alternative haplotig. Or low/haploid coverage scaffold with insufficient coverage of another scaffold to purge. | Core*      |
| HAPRPT        | As HAPLOTIG but with evidence for dominant repetitive sequences (high kmer frequencies and/or read depth regions).                                                                           | Repeat     |
| HPURGE        | Clear candidate haplotig to purge.                                                                                                                                                           | Quarantine |
| LOWCOV        | Very low read depth; low read depth with additional kmer signatures of poor raw data coverage; low read depth and assembly kmer signature of repetitive sequence                             | Junk       |
| LOWQUAL       | Short scaffolds failing to meet minimum length criterion.                                                                                                                                    | Junk       |
| PRIMARY       | Putative primary scaffold but with possible alternative scaffolds still in assembly and/or low-quality regions                                                                               | Core       |
| PRIRPT        | Putative primary scaffold but >50% repeated                                                                                                                                                  | Core       |
| QUALITY       | Highest quality scaffolds: diploid depth with Complete BUSCOs and no Duplicated BUSCOs.                                                                                                      | Core       |
| REPEAT        | Predominantly Diploid scaffolds that have major signs of redundancy, probably due to presence of alternative contigs                                                                         | Repeat     |
| RPURGE        | Messy scaffolds that are largely repeats and are sufficiently redundant/low quality to purge                                                                                                 | Quarantine |

364 \* Sequences rated HAPLOTIG should be reviewed for possible manual exclusion.

366

## 368 **Assembly polishing and gap-filling**

The assembly was first long-read polished with Racon (Racon, [RRID:SCR\\_017642](#)) v1.4.5 [49] and  
370 medaka v1.0.2 [50]. Then, the 10x reads were incorporated by short-read polishing using Pilon  
(Pilon, [RRID:SCR\\_014731](#)) v1.23 [51] with reads mapped using Minimap2 v2.12 [41] and correcting  
372 for indels only; we found correcting for indels only resulted in a higher BUSCO score than correcting  
for indels and SNPs following the steps described in this section. We scaffolded using SPACE-  
374 LongRead v1.1 [52] followed by gap-filling using gapFinisher v20190917 [53]. The assembly was  
scaffolded from 209 contigs into 138 scaffolds, however, no gaps were filled. After another round  
376 of long-read polishing with Racon v1.4.5 [49] and medaka v1.0.2 [50], we moved forward with a  
second round of tidying in Diploidocus v0.9.6 (default mode). Here, 128 scaffolds out of the 138  
378 were retained and consisted of 87 core, 41 repeat, 10 quarantine and 0 junk scaffolds.

## 380 **Hi-C scaffolding**

Hi-C data were aligned to the draft genome assembly using the Juicer (Juicer, [RRID:SCR\\_017226](#))  
382 pipeline v1.6 [54] then scaffolds were ordered and orientated using the 3D *de novo* assembly  
pipeline (3D de novo assembly, [RRID:SCR\\_017227](#)) v180922 [55]. The contact map was visualised  
384 using Juicebox Assembly Tools v1.11.08 [56] and errors over 3 review rounds were corrected  
manually to resolve 11 chromosomes (Figure 5). Although the assembly was in 2,357 scaffolds  
386 following incorporation of Hi-C data; the N50 increased by over 4-fold to 68.9 Mb. Surprisingly, the  
contig number increased considerably from 148 to 3,537, suggesting that the Hi-C data and NECAT  
388 assembly were in conflict, with possibilities of incorrectly joined sequences in the initial long-read  
assembly or the Hi-C data causing the draft assembly to split into an unnecessarily large number of  
390 fragments. The resulting assembly was tidied again using Diploidocus v10.0.6 (default mode) and  
1643 scaffolds (824,534,974 bp) were retained out of 2,357 (833,952,765 bp; 1,347 core, 296

392 repeat, 548 quarantine and 166 junk scaffolds). The fact that Diploidocus removed a high  
percentage of sequences, together with the assembly statistics from the widely-used long-read  
394 assemblers Canu and Flye (Table S1), suggests that NECAT is the cause of the unexpected jump in  
contig number following Hi-C scaffolding. However, the quality of the Hi-C library was not optimal  
396 to start with, so this may also have contributed to the high degree of fragmentation.

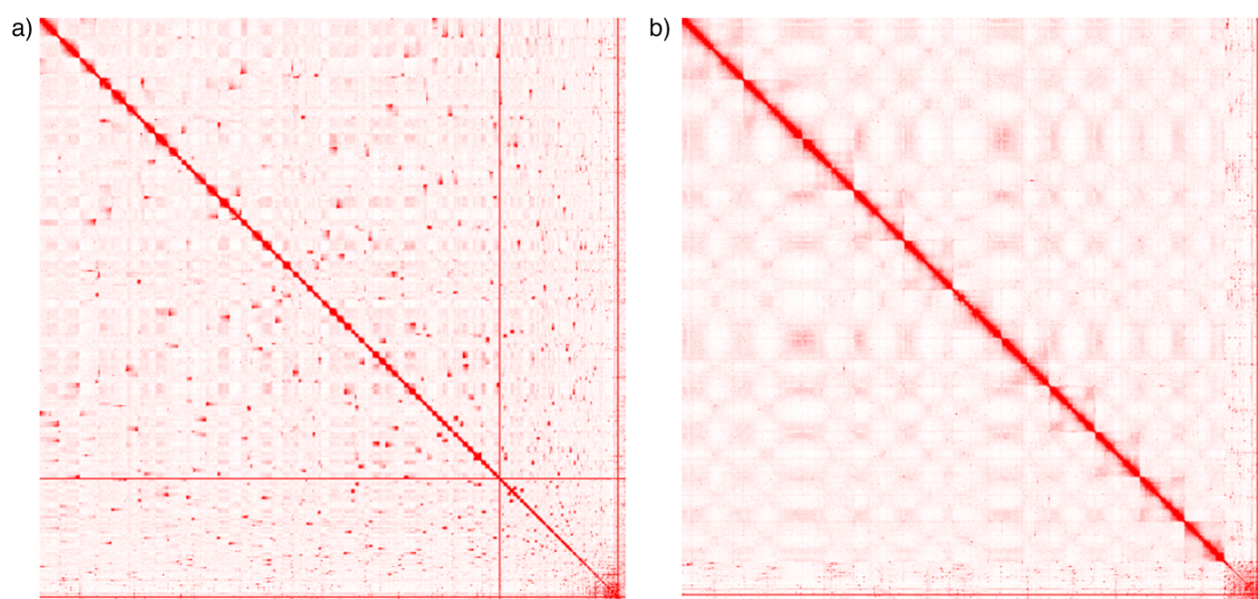

398

Figure 5. Hi-C contact matrices visualised in Juicebox.js in balanced normalisation mode a) before  
400 and b) after correction.

#### 402 **Final polishing and assembly clean-up**

A further round of long-read polishing with Racon v1.4.5 [49] and medaka v1.0.2 [50] was  
404 performed as described above. The assembly contiguity improved and there were 1,399 scaffolds  
and 1,595 contigs. We then short-read polished using Pilon v1.23 [51]. Two Pilon strategies were  
406 applied: (1) indel-only correction; (2) indel and SNP correction. We retained the indel and SNP  
corrected assembly as it resulted in a marginally higher BUSCO score compared to indel only  
408 correction (1311 vs 1310 complete BUSCOs); there was no change to contig nor scaffold numbers. A



final hybrid polish was performed using Hypo v1.0.3 [57]. The number of scaffolds remained as  
410 1,399, however, the BUSCO score improved slightly by 0.1 % to 91.2 % complete. Notably, Hypo  
polishing improved the Merqury QV score from 29.8 to 33.9. The assembly was concluded with a  
412 final tidy with Diploidocus v0.14.1 (default mode). For the final assembly 1,289 scaffolds were  
retained from the 1,399 scaffolds (1,084 core, 205 repeat, 72 quarantine and 38 junk). All gaps in  
414 the assembly were then standardised to 100 bp.

#### 416 **Tspe\_v1 reference genome**

Assembly of 48.3 Gb of Nanopore long-read data and 123.4 Gb of Illumina short-read data (10x  
418 linked-reads) followed by scaffolding with Hi-C data produced a 823.3 Mb haploid genome,  
representing 93.9 % of the DepthSizer estimated genome size. The final assembly contained 1,289  
420 scaffolds with an N50 of 69.0 Mb and L50 of 6 (Table 5). The Hi-C data facilitated scaffolding into 11  
chromosomes, conforming to previous cytological studies [37], and the anchored proportion of  
422 Tspe\_v1 spanned 94.2 % of the final assembly; the chromosomes were numbered by descending  
length (Table S5) as this is the first instance *Telopea* chromosomes have been studied in detail.

424  
From a core set of 1,440 single-copy orthologues from the Embryophyta lineage, 91.4 % were  
426 complete in the assembly (81.8 % as single-copy, 9.5 % as duplicates), 2.7% were fragmented and  
only 5.9 % were not found, suggesting that the assembly includes most of the waratah gene space.  
428 The Tspe\_v1 assembly is comparable in completeness to the *Macadamia integrifolia*  
(SCU\_Mint\_v3) assembly [14], which also combined long-read and Illumina sequences (90.6 % vs  
430 80.0 % complete BUSCOs, respectively, in the anchored portion of the assembly). BUSCOMP  
analysis revealed that only 2.2% genes were not found by BUSCO in any version of the assembly.

432 The Merqury v1.0 [35] QV score of the assembly was 34.03, indicating a base-level accuracy of  
>99.99 % (Figure S2).

434

### **Genome visualisation**

436 Features (gaps, GC content, gene density and repeat density) of the main nuclear chromosome  
scaffolds of the Tspe\_v1 assembly were visualised as a circular diagram using the R package circlize  
438 v0.4.12 [58] (Figure 6). GC content was calculated in sliding windows of 50 kb using BEDTools  
v2.27.1 [47]. There were 147 gaps of unknown length across the 11 chromosomes, represented as  
440 100 bp gaps in the assembly. An inverse pattern in the incidence of genes and repeats was  
observed across all chromosomes, with repeat content generally peaking towards the centre of  
442 each chromosome, suggesting predominantly metacentric and submetacentric chromosomes. This  
pattern may represent enriched repeat content and reduced coding content in pericentromeric  
444 regions, although further study is required to identify the centromeres [59–61].

446

448

450

452

454 Table 5. Genome assembly and annotation statistics for the *Telopea speciosissima* reference genome.

| <b>Statistic</b>                           | <b>Tspe_v1</b>       |
|--------------------------------------------|----------------------|
| <b>Total length (bp)</b>                   | <b>823,061,212</b>   |
| <b>No. of scaffolds</b>                    | <b>1,289</b>         |
| N50 (bp)                                   | 69,013,595           |
| L50                                        | 6                    |
| <b>No. of contigs</b>                      | <b>1,452</b>         |
| N50 (bp)                                   | 12,206,888           |
| L50                                        | 21                   |
| N bases                                    | 18,174               |
| GC (%)                                     | 40.11                |
| <b>BUSCO complete (genome; n = 1440)</b>   | <b>91.2 % (1314)</b> |
| Single copy (genome)                       | 81.5 % (1174)        |
| Duplicated (genome)                        | 9.7 % (140)          |
| BUSCO fragmented (genome)                  | 2.9 % (42)           |
| BUSCO missing (genome)                     | 5.9 % (84)           |
| <b>Protein-coding genes</b>                | <b>40,158</b>        |
| mRNAs                                      | 46,877               |
| rRNAs                                      | 351                  |
| tRNAs                                      | 728                  |
| <b>BUSCO complete (proteome; n = 1440)</b> | <b>94.0 % (1353)</b> |
| Single copy (proteome)                     | 79.3 % (1143)        |
| Duplicated (proteome)                      | 14.7 % (211)         |
| BUSCO fragmented (proteome)                | 3.4 % (49)           |
| BUSCO missing (proteome)                   | 2.6 % (38)           |

456

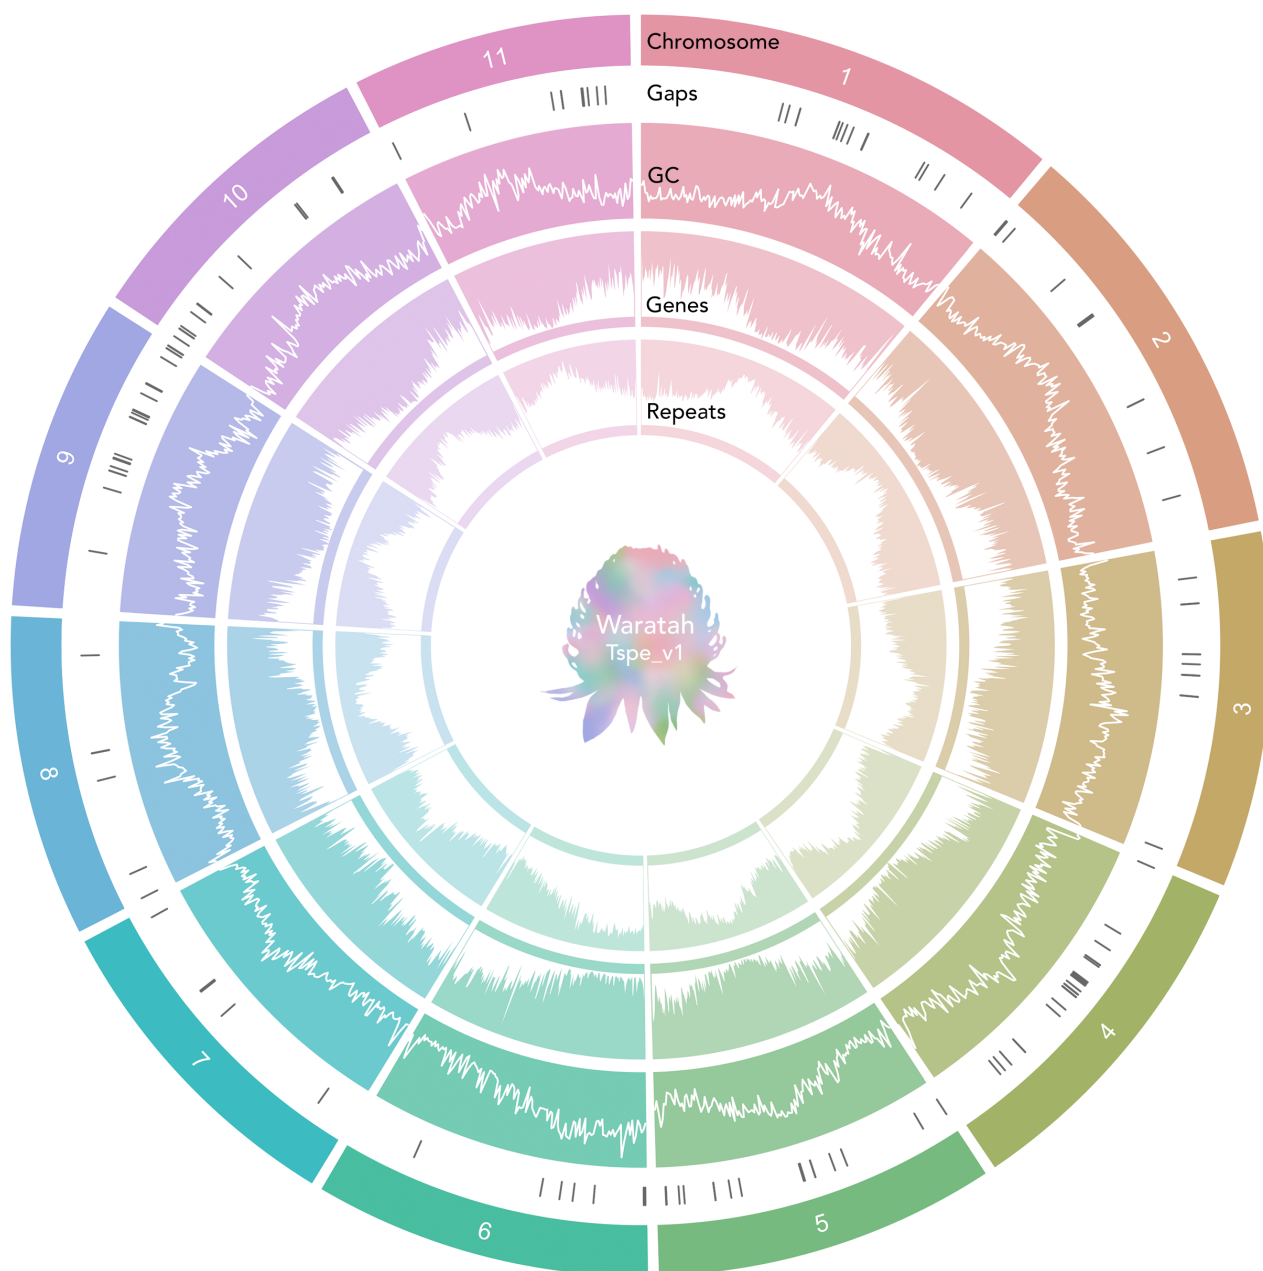

458 Figure 6. Features of the 11 chromosomes of the *Telopea speciosissima* reference genome depicted  
as a circlize diagram. Concentric tracks from the outside inward represent: chromosomes, gaps  
460 (gaps of unknown length appear as 100 bp in the assembly), GC content, gene density and repeat  
density. The latter three tracks denote values in 500 kb sliding windows. Density was defined as the  
462 fraction of a genomic window that is covered by genomic regions. Plots are white on a solid  
background coloured by chromosome.

## 464 GENOME ANNOTATION

### 466 **Heterozygosity and repetitive elements**

Genome-wide heterozygosity was estimated to be 0.756 % using trimmed 10x reads with

468 GenomeScope [40] from the k-mer 20 histogram computed using Jellyfish (Jellyfish, [RRID:SCR\\_005491](#)) v2.2.10 [62] (Figure S1b).

470

We identified and quantified repeats using RepeatModeler (RepeatModeler, [RRID:SCR\\_015027](#))

472 v2.0.1 and RepeatMasker (RepeatMasker, [RRID:SCR\\_012954](#)) v4.1.0 [63] and showed that the *T.*

*speciosissima* genome is highly repetitive, with repeats accounting for 62.3 % of sequences (Table

474 S6). Class I transposable elements (TEs) or retrotransposons were the most pervasive classified

repeat class (20.3 % of the genome), and were dominated by long terminal repeat (LTR)

476 retrotransposons (18.1 %). Class II TEs (DNA transposons) only accounted for 0.03 % of the genome.

### 478 **Gene prediction**

The genome was annotated using the homology-based gene prediction program GeMoMa

480 (GeMoMa, [RRID:SCR\\_017646](#)) v1.7.1 [64] with four reference genomes downloaded from NCBI:

*Macadamia integrifolia* (SCU\_Mint\_v3, GCA\_013358625.1), *Nelumbo nucifera* (Chinese Lotus 1.1,

482 GCA\_000365185.2), *Arabidopsis thaliana* (TAIR10.1, GCA\_000001735.2) and *Rosa chinensis*

(RchiOBHm-V2, GCA\_002994745.2). The annotation files for *M. integrifolia* were downloaded from

484 the Southern Cross University data repository ([doi.org/10.25918/5e320fd1e5f06](https://doi.org/10.25918/5e320fd1e5f06)).

486 Genome annotation predicted 40,126 protein-coding genes and 46,842 mRNAs in the *T.*

*speciosissima* assembly, which fits the expectation for plant genomes [65]. Of these genes, 40,158

488 appeared in the 11 chromosomes (Table S5). Of 1,440 Embryophyta orthologous proteins, 94.0 %  
were complete in the annotation (79.3 % as single-copy, 14.7 % as duplicates), 3.4 % were  
490 fragmented and 2.6 % were missing.

492 Additionally, 351 ribosomal RNA genes were predicted with Barrnap (Barrnap, [RRID:SCR\\_015995](#))  
v0.9 [66] and a set of 728 high-confidence transfer RNAs (tRNAs) was predicted with tRNAscan-SE  
494 (tRNAscan-SE, [RRID:SCR\\_010835](#)) v2.05 [67], implementing Infernal (Infernal, [RRID:SCR\\_011809](#))  
v1.1.2 [68]. A set of 2,419 tRNAs was initially predicted and filtered to 760 using the recommended  
496 protocol for eukaryotes. Then, 22 tRNAs with mismatched isotype and 10 with unexpected  
anticodon were removed to form the high-confidence set.

498

### Orthologous clusters

500 The protein sequences of Tspe\_v1 and the four species used in the GeMoMa annotation were  
clustered into orthologous groups using OrthoVenn2 [69]. The five species formed 24,140 clusters:  
502 23,031 orthologous clusters (containing at least 2 species) and 1,109 single-copy gene clusters.  
There were 9,463 orthologous families common to all of the species. The three members of the  
504 order Proteales (*T. speciosissima*, *M. integrifolia* and *N. nucifera*) shared 456 families (Figure 7 and  
Figure S3).

506

Tests for gene ontology (GO) enrichment of 912 waratah-specific clusters identified 12 significant  
508 terms (Table S7). The most enriched GO terms were DNA recombination (GO:0006310,  $P = 1.8 \times 10^{-27}$ ),  
retrotransposon nucleocapsid (GO:0000943,  $P = 3.5 \times 10^{-12}$ ) and DNA integration (GO:0015074,  
510  $P = 4.1 \times 10^{-11}$ ).



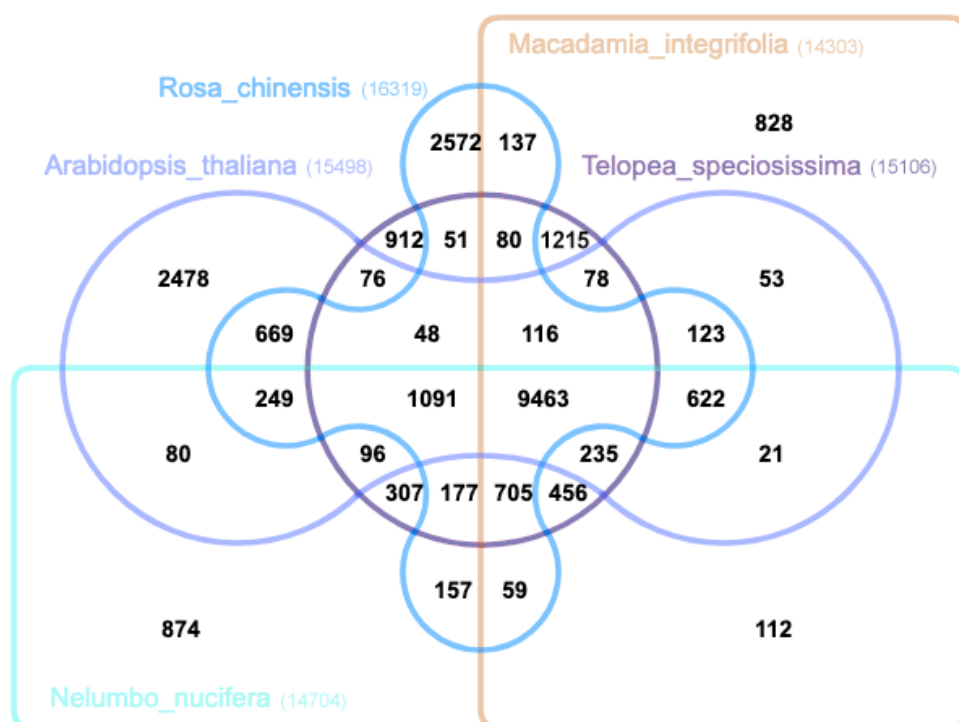

512 Figure 7. Orthologous gene clusters shared among the three members of the order Proteales –  
 513 *Telopea speciosissima*, *Macadamia integrifolia* and *Nelumbo nucifera* – and the core eudicots –  
 514 *Arabidopsis thaliana* (Brassicales) and *Rosa chinensis* (Rosales).

### 516 Synteny between *Telopea* and *Macadamia*

Synteny between the *Telopea* (Tspe\_v1) and *Macadamia* (SCU\_Mint\_v3) genomes was explored  
 518 with satsuma2 version untagged-2c08e401140c1ed03e0f with parameters -l 3000 -do\_refine 1 -  
 min\_matches 40 -cutoff 2 -min\_seed\_length 48 and visualised with the ChromosomePaint function  
 520 [70] and MizBee v1.0 [71]. The *Macadamia* genome ( $2n = 28$ ) has six more chromosomes than the  
*Telopea* genome ( $2n = 22$ ), but the two species have similar estimated genome sizes – 896 Mb [14]  
 522 compared to 874 Mb. It is thought that the ancestral Proteaceae had a chromosome number of  $x =$   
 7 [72–75], although the occurrence of paleo-polyploidy in family has been debated [76]. Overall,  
 524 synteny analyses reveal an abundance of interchromosomal rearrangements between the *Telopea*  
 and *Macadamia* genomes, reflecting the long time since their divergence (73-83 Ma [77]).

526 However, a number of regions exhibit substantial collinearity, for example, *Telopea* chromosome 09  
and *Macadamia* chromosome 11 (Figure 8 and Figure S4).

528

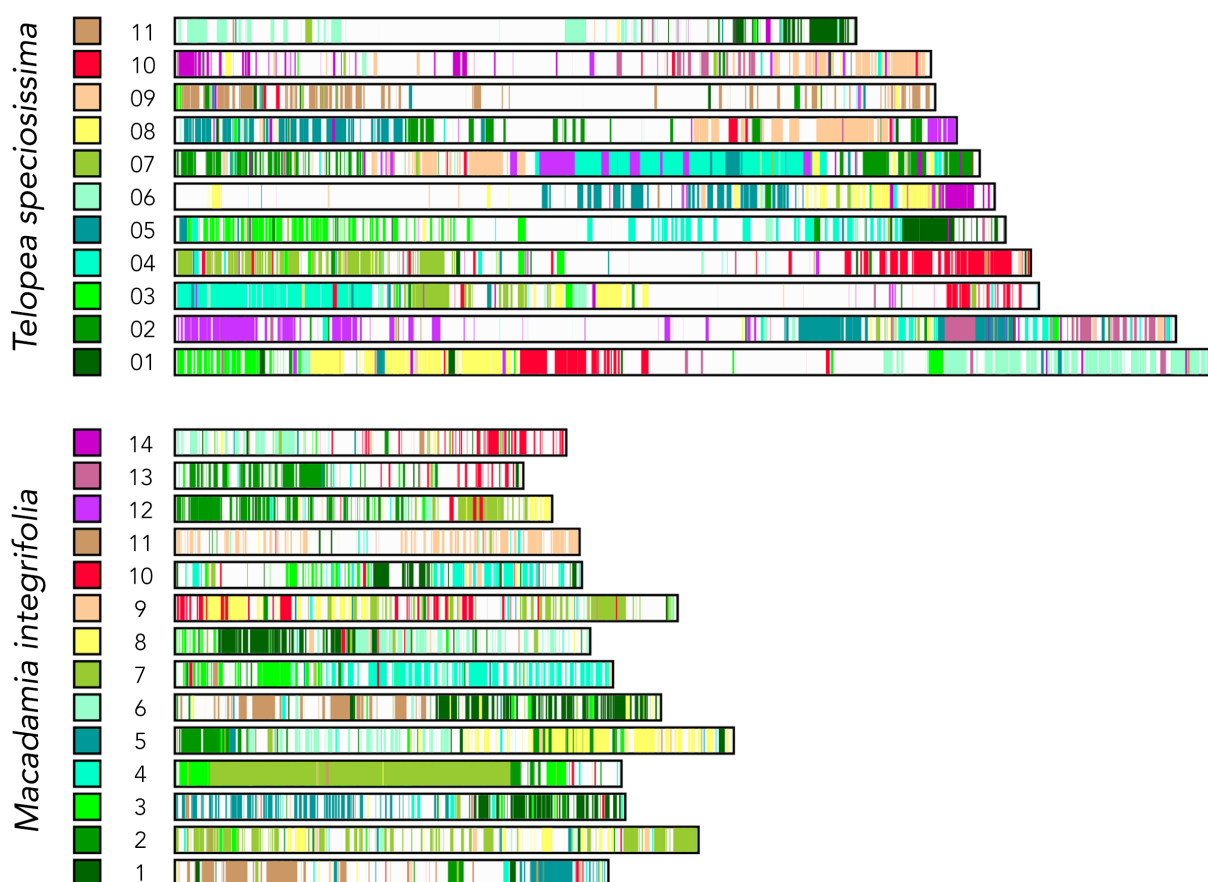

530 Figure 8. Synteny between *Telopea speciosissima* ( $2n = 22$ ) and *Macadamia integrifolia* ( $2n = 28$ ).

## CONCLUSIONS

532

We present a high-quality annotated chromosome-level reference genome of *Telopea*

534 *speciosissima* assembled from Oxford Nanopore long-reads, 10x Genomics Chromium linked-reads  
and Hi-C (823 Mb in length, N50 of 69.9 Mb and BUSCO completeness of 91.2 %): the first for a

536 waratah, and only the second publicly available Proteaceae reference genome. We envisage these

data will be a platform to underpin evolutionary genomics, gene discovery, breeding and the  
538 conservation of Proteaceae and the Australian flora.

## 540 DATA AVAILABILITY

542 The Tspe\_v1 genome was deposited to NCBI under BioProject PRJNA712988 and BioSample  
SAMN18238110 along with the raw data (ONT, 10x and Hi-C) to SRA as SRR14018636, SRR14018635  
544 and SRR14018634. Supporting data are available in the GigaScience database (GigaDB,  
RRID:SCR\_004002) [TBC].

546

Data for species used for genome annotation are available at the following repositories:

548 *Macadamia integrifolia*

[https://ftp.ncbi.nlm.nih.gov/genomes/all/GCA/013/358/625/GCA\\_013358625.1\\_SCU\\_Mint\\_v3/](https://ftp.ncbi.nlm.nih.gov/genomes/all/GCA/013/358/625/GCA_013358625.1_SCU_Mint_v3/)

550 [doi.org/10.25918/5e320fd1e5f06](https://doi.org/10.25918/5e320fd1e5f06)

*Arabidopsis thaliana*

552 [https://ftp.ncbi.nlm.nih.gov/genomes/all/GCF/000/001/735/GCF\\_000001735.4\\_TAIR10.1/](https://ftp.ncbi.nlm.nih.gov/genomes/all/GCF/000/001/735/GCF_000001735.4_TAIR10.1/)

*Rosa chinensis*

554 [https://ftp.ncbi.nlm.nih.gov/genomes/all/GCA/002/994/745/GCA\\_002994745.2\\_RchiOBHm-V2/](https://ftp.ncbi.nlm.nih.gov/genomes/all/GCA/002/994/745/GCA_002994745.2_RchiOBHm-V2/)

*Nelumbo nucifera*

556 [https://ftp.ncbi.nlm.nih.gov/genomes/all/GCF/000/365/185/GCF\\_000365185.1\\_Chinese\\_Lotus\\_1.1/](https://ftp.ncbi.nlm.nih.gov/genomes/all/GCF/000/365/185/GCF_000365185.1_Chinese_Lotus_1.1/)

## 558 LIST OF ABBREVIATIONS

- 560 BLAST: Basic Local Alignment Search Tool
- bp: base pairs
- 562 BUSCO: Benchmarking Universal Single-Copy Orthologs
- CTAB: cetyl trimethylammonium bromide
- 564 Gb: gigabase pairs
- GC: guanine-cytosine
- 566 Hi-C: high-throughput chromosome conformation capture
- HMW: high molecular weight
- 568 kb: kilobase pairs
- LINE: long interspersed nuclear element
- 570 LTR: long terminal repeat
- Mb: megabase pairs
- 572 mRNA: messenger RNA
- NCBI: National Centre for Biotechnology Information
- 574 ONT: Oxford Nanopore Technologies
- PE: paired-end
- 576 QV: Merqury consensus quality value
- rRNA: ribosomal RNA
- 578 SINE: short interspersed nuclear element
- SNP: single-nucleotide polymorphism
- 580 TE: transposable element

## 582 CONSENT FOR PUBLICATION

584 Not applicable.

## 586 COMPETING INTERESTS

588 The authors declare that they have no competing interests.

## 590 FUNDING

592 We would like to acknowledge the contribution of the Genomics for Australian Plants Framework  
Initiative consortium (<https://www.genomicsforaustralianplants.com/consortium/>) in the  
594 generation of data used in this publication. The Initiative is supported by funding from Bioplatforms  
Australia (enabled by NCRIS), the Ian Potter Foundation, Royal Botanic Gardens Foundation  
596 (Victoria), Royal Botanic Gardens Victoria, the Royal Botanic Gardens and Domain Trust, the Council  
of Heads of Australasian Herbaria, CSIRO, Centre for Australian National Biodiversity Research and  
598 the Department of Biodiversity, Conservation and Attractions, Western Australia. SHC was  
supported through an Australian Government Research Training Program Scholarship. RJE was  
600 funded by the Australian Research Council (LP160100610 and LP18010072).

## 602 AUTHORS' CONTRIBUTIONS

604 JGB coordinated the project. MR, MvdM, PL-I, HS, GB, JGB and RJE designed the study and funded  
the project. GB provided the samples. PL-I and J-YSY performed optimised DNA extraction protocols  
606 and performed extractions. SHC performed the genome assembly, scaffolding and annotation. RJE  
conceptualised and developed Diploidocus and DepthSizer. SHC wrote the manuscript. All authors  
608 edited and approved the final manuscript.

## 610 ACKNOWLEDGEMENTS

612 We thank Stuart Allan for providing access to the sequenced plant and assistance with sample  
collection at Blue Mountains Botanic Garden. We thank the members of UNSW Research  
614 Technology Services, particularly Duncan Smith, for help with software installation on the high-  
performance computing cluster Katana. We acknowledge Mabel Lum for assistance with the  
616 Bioplatforms Australia data portal. ONT and 10x sequencing were conducted at the Australian  
Genome Research Facility (AGRF). Hi-C library prep and sequencing was conducted at the  
618 Ramaciotti Centre for Genomics at the University of New South Wales.

## 620 REFERENCES

- 622 1. Nixon P. The Waratah. Kenthurst, NSW: Kangaroo Press; 1987.
- 624 2. Crisp MD, Weston PH. Geographic and ontogenetic variation in morphology of Australian waratahs  
(*Telopea*: Proteaceae). *Syst Biol*. 1993; doi: 10.2307/2992556.
- 626 3. Weston PH, Crisp MD. Cladistic biogeography of waratahs (Proteaceae, Embothriaceae) and their allies  
across the pacific. *Aust Syst Bot*. 1994; doi: 10.1071/sb9940225.
- 628 4. Rossetto M, Thurlby KA, Offord CA, Allen CB, Weston PH. The impact of distance and a shifting  
temperature gradient on genetic connectivity across a heterogeneous landscape. *BMC Evol Biol*. 2011; doi:  
10.1186/1471-2148-11-126.

- 630 5. Rossetto M, Allen CB, Thurlby KAG, Weston PH, Milner ML. Genetic structure and bio-climatic modeling  
632 support allopatric over parapatric speciation along a latitudinal gradient. *BMC Evol Biol.* 2012; doi:  
10.1186/1471-2148-12-149.
- 634 6. Ellegren H, Smeds L, Burri R, Olason PI, Backström N, Kawakami T, et al.. The genomic landscape of species  
divergence in *Ficedula* flycatchers. *Nature.* Nature Publishing Group; 2012; doi: 10.1038/nature11584.
- 636 7. Hoban S, Kelley JL, Lotterhos KE, Antolin MF, Bradburd G, Lowry DB, et al.. Finding the genomic basis of  
local adaptation: pitfalls, practical solutions, and future directions. *Am Nat.* 2016; doi: 10.1086/688018.
- 638 8. Lewin HA, Robinson GE, Kress WJ, Baker WJ, Coddington J, Crandall KA, et al.. Earth BioGenome Project:  
Sequencing life for the future of life. *Proc Natl Acad Sci.* 2018; doi: 10.1073/pnas.1720115115.
9. Radwan J, Babik W. The genomics of adaptation. *Proc R Soc B Biol Sci.* 2012; doi: 10.1098/rspb.2012.2322.
- 640 10. Seehausen O, Butlin RK, Keller I, Wagner CE, Boughman JW, Hohenlohe PA, et al.. Genomics and the  
origin of species. *Nat Rev Genet.* Nature Publishing Group; 2014; doi: 10.1038/nrg3644.
- 642 11. Royal Botanic Gardens, Kew. State of the World's Plants 2017. Royal Botanic Gardens, Kew; 2017. Report  
No.: 978-1-84246-647-6.
- 644 12. Mast AR, Willis CL, Jones EH, Downs KM, Weston PH. A smaller *Macadamia* from a more vagile tribe:  
646 inference of phylogenetic relationships, divergence times, and diaspore evolution in *Macadamia* and  
relatives (tribe Macadamieae; Proteaceae). *Am J Bot.* Wiley Online Library; 2008; 95:843-70.
- 648 13. Weston PH. Proteaceae. In: Kubitzki K, editor. The Families and Genera of Vascular Plants. Volume IX.  
Berlin: Springer-Verlag; 2006. p. 364-404.
- 650 14. Nock CJ, Baten A, Mauleon R, Langdon KS, Topp B, Hardner C, et al.. Chromosome-scale assembly and  
annotation of the macadamia genome (*Macadamia integrifolia* HAES 741). *G3 Genes Genomes Genet.* 2020;  
doi: 10.1534/g3.120.401326.
- 652 15. Nock CJ, Baten A, Barkla BJ, Furtado A, Henry RJ, King GJ. Genome and transcriptome sequencing  
654 characterises the gene space of *Macadamia integrifolia* (Proteaceae). *BMC Genomics.* 2016; doi:  
10.1186/s12864-016-3272-3.
- 656 16. Offord CA. Analysis of characters and germplasm of significance to improvement of Australian native  
waratahs (*Telopea* spp., family Proteaceae) for cut flower production. *Genet Resour Crop Evol.* 2006; doi:  
10.1007/s10722-005-3487-7.
- 658 17. Inglis PW, Pappas M de CR, Resende LV, Grattapaglia D. Fast and inexpensive protocols for consistent  
660 extraction of high quality DNA and RNA from challenging plant and fungal samples for high-throughput SNP  
genotyping and sequencing applications. *PLOS ONE.* 2018; doi: 10.1371/journal.pone.0206085.
- 662 18. Schalamun M, Nagar R, Kainer D, Beavan E, Eccles D, Rathjen JP, et al.. Harnessing the MinION: an  
example of how to establish long-read sequencing in a laboratory using challenging plant tissue from  
*Eucalyptus pauciflora*. *Mol Ecol Resour.* 2019; doi: <https://doi.org/10.1111/1755-0998.12938>.
- 664 19. Lu-Irving P, Rutherford S: High molecular weight DNA extraction from leaf tissue.  
[dx.doi.org/10.17504/protocols.io.bu9ynz7w](https://doi.org/10.17504/protocols.io.bu9ynz7w) (2021).
- 666 20. Wick RR, Judd LM, Gorrie CL, Holt KE. Completing bacterial genome assemblies with multiplex MinION  
sequencing. *Microb Genomics.* 2017; doi: 10.1099/mgen.0.000132.

- 668 21. De Coster W, D’Hert S, Schultz DT, Cruts M, Van Broeckhoven C. NanoPack: visualizing and processing long-read sequencing data. *Bioinformatics*. 2018; doi: 10.1093/bioinformatics/bty149.
- 670 22. Andrews S. FastQC: a quality control tool for high throughput sequence data. 2010; [www.bioinformatics.babraham.ac.uk/projects/fastqc/](http://www.bioinformatics.babraham.ac.uk/projects/fastqc/).
- 672 23. Phase Genomics. hic\_qc. 2019; [https://github.com/phasegenomics/hic\\_qc](https://github.com/phasegenomics/hic_qc).
- 674 24. Chen Y, Nie F, Xie S-Q, Zheng Y-F, Dai Q, Bray T, et al.. Efficient assembly of nanopore reads via highly accurate and intact error correction. *Nat Commun*. Nature Publishing Group; 2021; doi: 10.1038/s41467-020-20236-7.
- 676 25. Kolmogorov M, Yuan J, Lin Y, Pevzner PA. Assembly of long, error-prone reads using repeat graphs. *Nat Biotechnol*. Nature Publishing Group; 2019; doi: 10.1038/s41587-019-0072-8.
- 678 26. Koren S, Walenz BP, Berlin K, Miller JR, Bergman NH, Phillippy AM. Canu: scalable and accurate long-read assembly via adaptive k-mer weighting and repeat separation. *Genome Res*. 2017; doi:  
680 10.1101/gr.215087.116.
- 682 27. Jordan GJ, Carpenter RJ, Koutoulis A, Price A, Brodribb TJ. Environmental adaptation in stomatal size independent of the effects of genome size. *New Phytol*. 2015; doi: 10.1111/nph.13076.
- 684 28. Weisenfeld NI, Kumar V, Shah P, Church DM, Jaffe DB. Direct determination of diploid genome sequences. *Genome Res*. 2017; doi: 10.1101/gr.214874.116.
- 686 29. Simão FA, Waterhouse RM, Ioannidis P, Kriventseva EV, Zdobnov EM. BUSCO: assessing genome assembly and annotation completeness with single-copy orthologs. *Bioinforma Oxf Engl*. 2015; doi: 10.1093/bioinformatics/btv351.
- 688 30. Altschul SF, Gish W, Miller W, Myers EW, Lipman DJ. Basic local alignment search tool. *J Mol Biol*. Elsevier; 1990; 215:403–10.
- 690 31. Finn RD, Clements J, Eddy SR. HMMER web server: interactive sequence similarity searching. *Nucleic Acids Res*. Oxford University Press; 2011; 39:W29–37.
- 692 32. Stanke M, Morgenstern B. AUGUSTUS: a web server for gene prediction in eukaryotes that allows user-defined constraints. *Nucleic Acids Res*. Oxford University Press; 2005; 33:W465–7.
- 694 33. Rice P, Longden I, Bleasby A. EMBOSS: the European Molecular Biology Open Software Suite. *Trends Genet TIG*. 2000; doi: 10.1016/s0168-9525(00)02024-2.
- 696 34. Stuart KC, Edwards RJ, Cheng Y, Warren WC, Burt DW, Sherwin WB, et al.. Transcript- and annotation-guided genome assembly of the European starling. *bioRxiv*. Cold Spring Harbor Laboratory; 2021; doi:  
698 10.1101/2021.04.07.438753.
- 700 35. Rhie A, Walenz BP, Koren S, Phillippy AM. Merqury: reference-free quality, completeness, and phasing assessment for genome assemblies. *Genome Biol*. BioMed Central; 2020; 21:1–27.
- 702 36. Bushnell B. BBMap: a fast, accurate, splice-aware aligner. 2014; <https://sourceforge.net/projects/bbmap/>.
- 704 37. Darlington CD, Wylie AP. Chromosome atlas of flowering plants. London, UK: George Allen and Unwin Ltd.; 1956.



38. Ramsay H. Chromosome numbers in the Proteaceae. *Aust J Bot.* 1963; 11:1–20.
- 706 39. Ranallo-Benavidez TR, Jaron KS, Schatz MC. GenomeScope 2.0 and Smudgeplots: Reference-free profiling of polyploid genomes. *bioRxiv.* 2019; doi: 10.1101/747568.
- 708 40. Vurture GW, Sedlazeck FJ, Nattestad M, Underwood CJ, Fang H, Gurtowski J, et al.. GenomeScope: fast reference-free genome profiling from short reads. *Bioinformatics.* 2017; doi: 10.1093/bioinformatics/btx153.
- 710 41. Li H. Minimap2: pairwise alignment for nucleotide sequences. *Bioinformatics.* 2018; doi: 10.1093/bioinformatics/bty191.
- 712 42. Edwards RJ, Field MA, Ferguson JM, Dudchenko O, Keilwagen J, Rosen BD, et al.. Chromosome-length genome assembly and structural variations of the primal Basenji dog (*Canis lupus familiaris*) genome. *BMC Genomics.* 2021; doi: 10.1186/s12864-021-07493-6.
- 714 43. Li H, Handsaker B, Wysoker A, Fennell T, Ruan J, Homer N, et al.. The Sequence Alignment/Map format and SAMtools. *Bioinformatics.* 2009; doi: 10.1093/bioinformatics/btp352.
- 716 44. R Core Team. R: A Language and Environment for Statistical Computing. Vienna, Austria: R Foundation for Statistical Computing; <https://www.R-project.org/>
- 718 45. Field MA, Rosen BD, Dudchenko O, Chan EKF, Minoche AE, Edwards RJ, et al.. Canfam\_GSD: De novo chromosome-length genome assembly of the German Shepherd Dog (*Canis lupus familiaris*) using a combination of long reads, optical mapping, and Hi-C. *GigaScience.* 2020; doi: 10.1093/gigascience/giaa027.
- 720 46. Roach MJ, Schmidt SA, Borneman AR. Purge Haplotigs: allelic contig reassignment for third-gen diploid genome assemblies. *BMC Bioinformatics.* 2018; doi: 10.1186/s12859-018-2485-7.
- 722 47. Quinlan AR, Hall IM. BEDTools: a flexible suite of utilities for comparing genomic features. *Bioinformatics.* 2010; doi: 10.1093/bioinformatics/btq033.
- 724 48. Mapleson D, Garcia Accinelli G, Kettleborough G, Wright J, Clavijo BJ. KAT: a K-mer analysis toolkit to quality control NGS datasets and genome assemblies. *Bioinformatics.* 2017; doi: 10.1093/bioinformatics/btw663.
- 726 49. Vaser R, Sović I, Nagarajan N, Šikić M. Fast and accurate de novo genome assembly from long uncorrected reads. *Genome Res.* 2017; doi: 10.1101/gr.214270.116.
- 728 50. Oxford Nanopore Technologies Ltd.. medaka. 2020; <https://github.com/nanoporetech/medaka>.
- 730 51. Walker BJ, Abeel T, Shea T, Priest M, Abouelliel A, Sakthikumar S, et al.. Pilon: an integrated tool for comprehensive Microbial variant detection and genome assembly improvement. *PLOS ONE.* 2014; doi: 10.1371/journal.pone.0112963.
- 732 52. Boetzer M, Pirovano W. SSPACE-LongRead: scaffolding bacterial draft genomes using long read sequence information. *BMC Bioinformatics.* 2014; doi: 10.1186/1471-2105-15-211.
- 734 53. Kammonen JI, Smolander O-P, Paulin L, Pereira PAB, Laine P, Koskinen P, et al.. GapFinisher: A reliable gap filling pipeline for SSPACE-LongRead scaffolder output. *PLOS ONE.* 2019; doi: 10.1371/journal.pone.0216885.
- 736 54. Durand NC, Shamim MS, Machol I, Rao SSP, Huntley MH, Lander ES, et al.. Juicer provides a one-click system for analyzing loop-resolution Hi-C experiments. *Cell Syst.* 2016; doi: 10.1016/j.cels.2016.07.002.

- 742 55. Dudchenko O, Batra SS, Omer AD, Nyquist SK, Hoeger M, Durand NC, et al.. De novo assembly of the  
744 *Aedes aegypti* genome using Hi-C yields chromosome-length scaffolds. *Science*. 2017; doi:  
10.1126/science.aal3327.
56. Dudchenko O, Shamim MS, Batra SS, Durand NC, Musial NT, Mostofa R, et al.. The Juicebox Assembly  
746 Tools module facilitates de novo assembly of mammalian genomes with chromosome-length scaffolds for  
under \$1000. *bioRxiv*. Cold Spring Harbor Laboratory; 2018; doi: 10.1101/254797.
- 748 57. Kundu R, Casey J, Sung W-K. HyPo: Super fast and accurate polisher for long read genome assemblies.  
2019; doi: 10.1101/2019.12.19.882506.
- 750 58. Gu Z, Gu L, Eils R, Schlesner M, Brors B. circlize implements and enhances circular visualization in R.  
*Bioinformatics*. 2014; doi: 10.1093/bioinformatics/btu393.
- 752 59. Jiang J, Birchler JA, Parrott WA, Kelly Dawe R. A molecular view of plant centromeres. *Trends Plant Sci*.  
2003; doi: 10.1016/j.tplants.2003.10.011.
- 754 60. Oliveira LC, Torres GA. Plant centromeres: genetics, epigenetics and evolution. *Mol Biol Rep*. Springer  
Science and Business Media LLC; 2018; doi: 10.1007/s11033-018-4284-7.
- 756 61. Simon L, Voisin M, Tatout C, Probst AV. Structure and function of centromeric and pericentromeric  
heterochromatin in *Arabidopsis thaliana*. *Front Plant Sci*. 2015; doi: 10.3389/fpls.2015.01049.
- 758 62. Marçais G, Kingsford C. A fast, lock-free approach for efficient parallel counting of occurrences of k-mers.  
*Bioinformatics*. 2011; doi: 10.1093/bioinformatics/btr011.
- 760 63. Tarailo-Graovac M, Chen N. Using RepeatMasker to identify repetitive elements in genomic sequences.  
*Curr Protoc Bioinforma*. 2009; doi: 10.1002/0471250953.bi0410s25.
- 762 64. Keilwagen J, Hartung F, Grau J. GeMoMa: homology-based gene prediction utilizing intron position  
conservation and RNA-seq data. *Methods Mol Biol Clifton NJ*. 2019; doi: 10.1007/978-1-4939-9173-0\_9.
- 764 65. Sterck L, Rombauts S, Vandepoele K, Rouzé P, Van de Peer Y. How many genes are there in plants (... and  
why are they there)? *Curr Opin Plant Biol*. 2007; doi: 10.1016/j.pbi.2007.01.004.
- 766 66. Seemann T. barrnap. 2018; <https://github.com/tseemann/barrnap>.
67. Lowe TM, Chan PP. tRNAscan-SE On-line: integrating search and context for analysis of transfer RNA  
768 genes. *Nucleic Acids Res*. 2016; doi: 10.1093/nar/gkw413.
68. Nawrocki EP, Eddy SR. Infernal 1.1: 100-fold faster RNA homology searches. *Bioinformatics*. 2013; doi:  
770 10.1093/bioinformatics/btt509.
69. Xu L, Dong Z, Fang L, Luo Y, Wei Z, Guo H, et al.. OrthoVenn2: a web server for whole-genome  
772 comparison and annotation of orthologous clusters across multiple species. *Nucleic Acids Res*. 2019; doi:  
10.1093/nar/gkz333.
- 774 70. Grabherr MG, Russell P, Meyer M, Mauceli E, Alföldi J, Di Palma F, et al.. Genome-wide synteny through  
highly sensitive sequence alignment: Satsuma. *Bioinformatics*. 2010; doi: 10.1093/bioinformatics/btq102.
- 776 71. Meyer M, Munzner T, Pfister H. MizBee: a multiscale synteny browser. *IEEE Trans Vis Comput Graph*.  
2009; doi: 10.1109/TVCG.2009.167.

- 778 72. Carta A, Bedini G, Peruzzi L. A deep dive into the ancestral chromosome number and genome size of  
flowering plants. *New Phytol.* 2020; doi: <https://doi.org/10.1111/nph.16668>.
- 780 73. Johnson L, Briggs B. Evolution in the Proteaceae. *Aust J Bot.* 1963; 11:21–61.
- 782 74. Johnson LAS, Briggs BG. On the Proteaceae—the evolution and classification of a southern family. *Bot J  
Linn Soc.* 1975; doi: [10.1111/j.1095-8339.1975.tb01644.x](https://doi.org/10.1111/j.1095-8339.1975.tb01644.x).
- 784 75. Murat F, Armero A, Pont C, Klopp C, Salse J. Reconstructing the genome of the most recent common  
ancestor of flowering plants. *Nat Genet.* 2017; doi: [10.1038/ng.3813](https://doi.org/10.1038/ng.3813).
- 786 76. Stace HM, Douglas AW, Sampson JF. Did ‘Paleo-polyploidy’ Really occur in Proteaceae? *Aust Syst Bot.*  
CSIRO PUBLISHING; 1998; doi: [10.1071/sb98013](https://doi.org/10.1071/sb98013).
- 788 77. Sauquet H, Weston PH, Anderson CL, Barker NP, Cantrill DJ, Mast AR, et al.. Contrasted patterns of  
hyperdiversification in Mediterranean hotspots. *Proc Natl Acad Sci.* 2009; doi: [10.1073/pnas.0805607106](https://doi.org/10.1073/pnas.0805607106).
